# Supplementary material for: LSI-based amperometric sensor for bio-imaging and multi-point biosensing
Source: Royal Society of Chemistry journal article supplement (doi:10.1039/c2lc40323d), 2012-01-01

### Supplementary Figure 1

Typical cyclic voltammogram of Os-HRP-modified Bio-LSI in PBS. Scan rate was 20 mV/s.

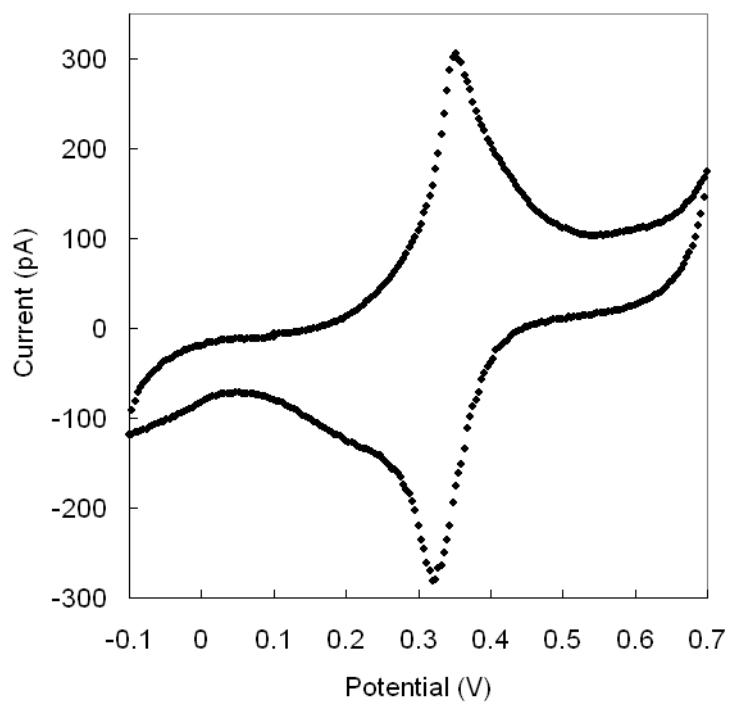

## Supplementary Figure 2

(A) Averaged graphs of 400 cyclic voltammograms obtained from each measurement of several concentrations of FcOH in 0.1 M KCl. The concentration of the FcOH is 2.0 mM (a), 1.0 mM (b), 0.50 mM (c), 0.25 mM (d), 0.125 mM (e), 0.0625 mM (f), and 0.0 mM (g). (B) The plot of the current at 0.5 V vs. FcOH concentration for the outward scan in graph A. The circles and error bars represent the average current and standard deviations of 400 measurement points on the chip.

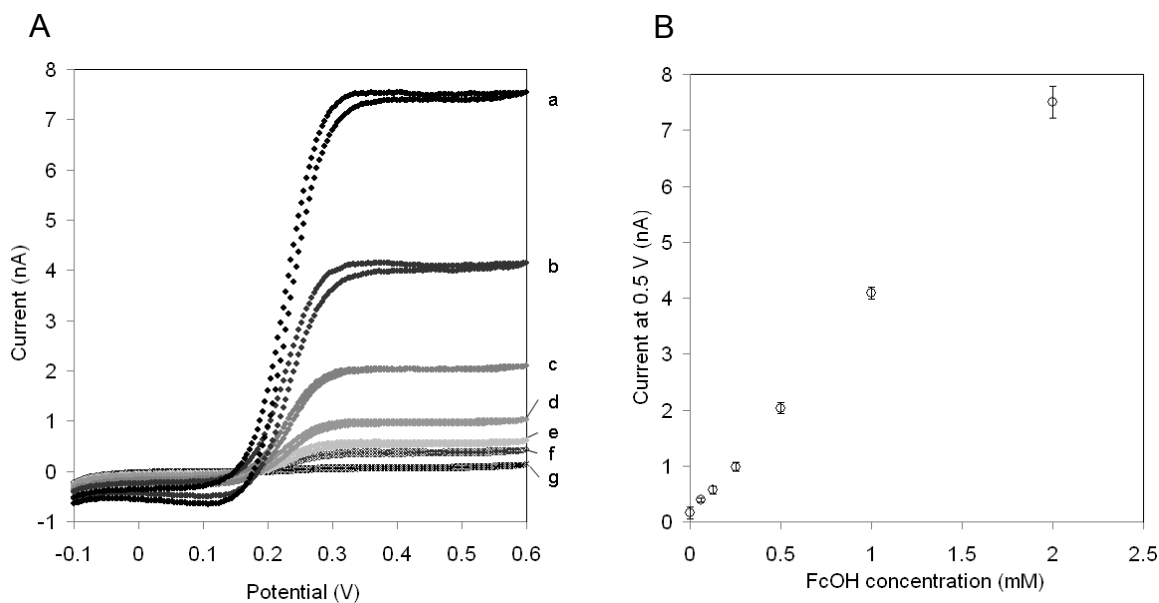

Supplement: c2lc40323d.pdf [file c2lc40323d.pdf]
