# Supplementary material for: LSI-based amperometric sensor for bio-imaging and multi-point biosensing
Source: Royal Society of Chemistry journal article supplement (doi:10.1039/c2lc40323d), 2012-01-01
Supplement: c2lc40323d_2.pdf [file c2lc40323d_2.pdf]

VIDEO TITLE, LEGENDS, and KEYWORDS

### **Supplementary Movie 1**

Title: Monitoring H<sub>2</sub>O<sub>2</sub> flow.

Legend: The ×1 video monitoring of the transients of the color map indicates the current intensities generated by H<sub>2</sub>O<sub>2</sub> flown through over the Os-HRP-coated Bio-LSI. Operation potential was 0.0 V vs. Ag|AgCl|sat. KCl.

Keywords: amperometry, bioimaging, complementary metal-oxide semiconductor (CMOS) sensor, electrode array, hydrogen peroxide, simultaneous multipoint monitoring

### **Supplementary Movie 2**

Title: Monitoring GOx activity.

Legend: The ×8 video monitoring of the H<sub>2</sub>O<sub>2</sub> generation and diffusion after glucose addition on partially GOx-spotted Os-HRP-coated Bio-LSI. Operation potential was 0.0 V vs. Ag|AgCl|sat. KCl.

Keywords: amperometry, bioimaging, complementary metal-oxide semiconductor (CMOS) sensor, electrode array, glucose oxidase, hydrogen peroxide, simultaneous multipoint monitoring
